# Supplementary material for: Solid State and Solution Study on the Formation of Inorganic Anion Complexes with a Series of Tetrazine-Based Ligands
Source: PubMed Central journal article supplement (PMC6631435; doi:10.3390/molecules24122247), 2019-06-16
Supplement: molecules-24-02247-s001.pdf [file molecules-24-02247-s001.pdf]

## Supplementary Materials

### **Thermodynamic and Structural Study on the Formation of Inorganic Anion Complexes with a Series of Tetrazine-Based Ligands**

Matteo Savastano,<sup>a</sup> Celeste García-Gallarín,<sup>b</sup> Claudia Giorgi,<sup>a</sup> Paola Gratteri,<sup>c</sup> Maria Dolores López de la Torre,<sup>b</sup> Carla Bazzicalupi,<sup>a\*</sup> Antonio Bianchi,<sup>\*a</sup> Manuel Melguizo<sup>\*b</sup>

<sup>a</sup> Department of Chemistry “Ugo Schiff”, University of Florence, Via della Lastruccia 3, 50019, Sesto Fiorentino, Italy.

<sup>b</sup> Department of Inorganic and Organic Chemistry, University of Jaén 23071, Jaén, Spain.

<sup>c</sup> Department NEUROFARBA – Pharmaceutical and nutraceutical section; Laboratory of Molecular Modeling Cheminformatics & QSAR, University of Firenze, via Ugo Schiff 6, 50019 Sesto Fiorentino, Italy.

Table S1. Selected contacts (Å) in the H<sub>2</sub>L3(ClO<sub>4</sub>)<sub>2</sub>·2H<sub>2</sub>O crystal structure. ESD in parentheses.

|       |          |
|-------|----------|
| N1–C4 | 3.414(9) |
| O3–C5 | 3.36(1)  |
| C8–O6 | 3.08(1)  |
| C3–O5 | 3.306(8) |
| C6–O4 | 3.561(8) |
| O2–O3 | 2.843(7) |
| O1–O2 | 2.830(7) |
| H1–O2 | 1.98(7)  |

Table S2. Selected contacts (Å) in the H<sub>2</sub>L4(ClO<sub>4</sub>)<sub>2</sub>·2H<sub>2</sub>O crystal structure. ESD in parentheses.

|         |          |
|---------|----------|
| N5–O4   | 2.766(4) |
| O4–O11  | 2.832(4) |
| O4–O14  | 2.814(4) |
| O12–C15 | 3.171(4) |
| O12–C16 | 3.255(4) |
| O14–C8  | 3.208(5) |
| O13–C15 | 3.177(5) |
| O13–C2  | 3.387(5) |
| O14–C9  | 3.218(4) |
| C17–O23 | 3.172(4) |
| O3–C9   | 3.197(4) |
| O23–O3  | 2.939(4) |
| O22–C6  | 3.245(4) |
| O21–O3  | 2.847(4) |
| N6–O3   | 2.721(4) |

Table S3. Selected contacts (Å) in the  $\text{H}_2\text{L3}(\text{PF}_6)_2$  crystal structure. Esd in parentheses.

|            |                      |
|------------|----------------------|
| C3–F1B/F1A | 3.284(9)/3.32(1)     |
| C6–F3B/F3A | 3.37(1)/3.37(1)      |
| C8–F3B/F3A | 3.29(1)/3.39(1)      |
| C7–F5B/F5A | 3.05(1)/2.95(1)      |
| C5–F5B/F5A | 3.17(1)/3.09(1)      |
| C3–F6B/F6A | 3.172(7)/3.129(.008) |
| C8–F6B/F6A | 3.266(8)/3.297(.009) |

Table S4. Selected contacts (Å) in the  $\text{H}_2\text{L3}(\text{PF}_6)_2 \cdot 2\text{H}_2\text{O}$  crystal structure. Esd in parentheses.

|       |          |
|-------|----------|
| C5–F2 | 3.308(5) |
| C8–F1 | 3.153(5) |
| C8–F6 | 3.162(5) |
| C4–F5 | 3.157(5) |
| C6–F3 | 3.269(5) |

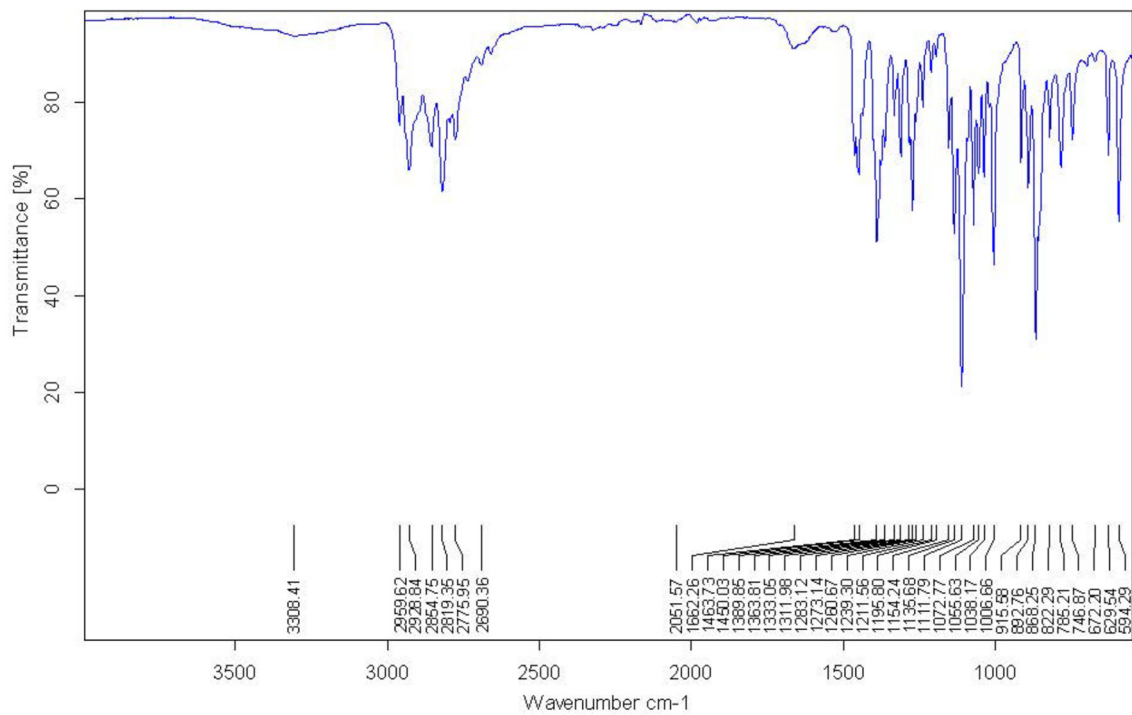

Figure S1. FTIR (ATR) of L3.

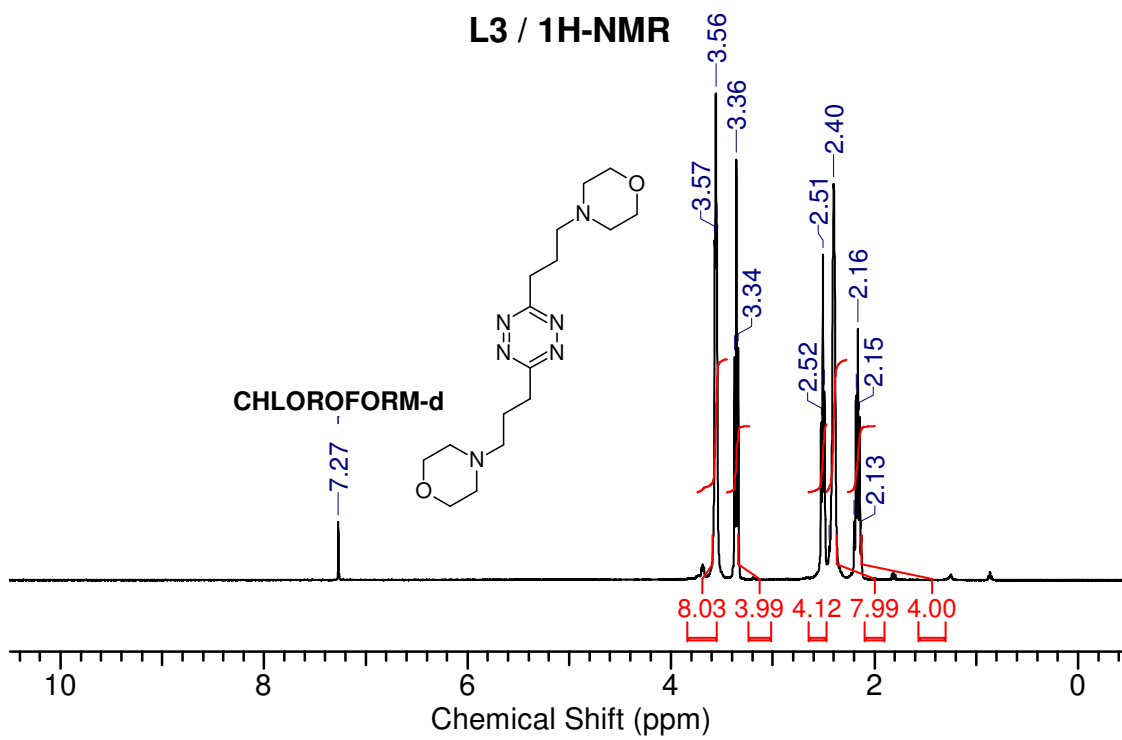

Figure S2. <sup>1</sup>H-NMR (CDCl<sub>3</sub>, 400 MHz) spectrum of L3.

### L3 / <sup>13</sup>C-NMR

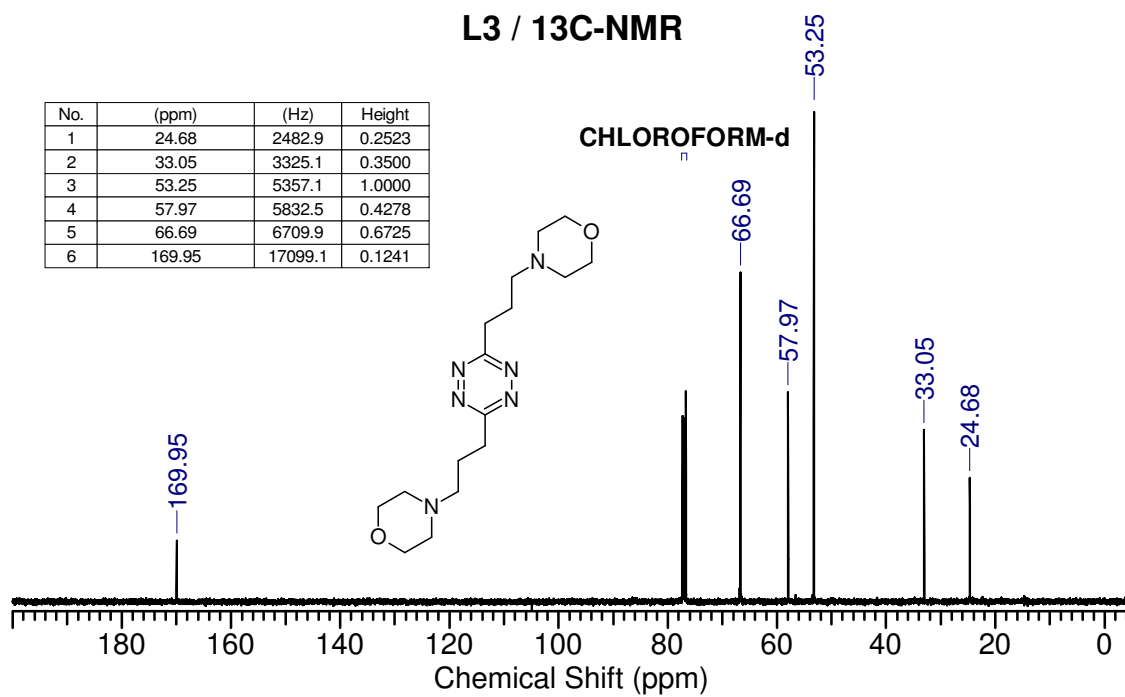

Figure S3. <sup>13</sup>C-NMR (CDCl<sub>3</sub>, 100 MHz) spectrum of L3.

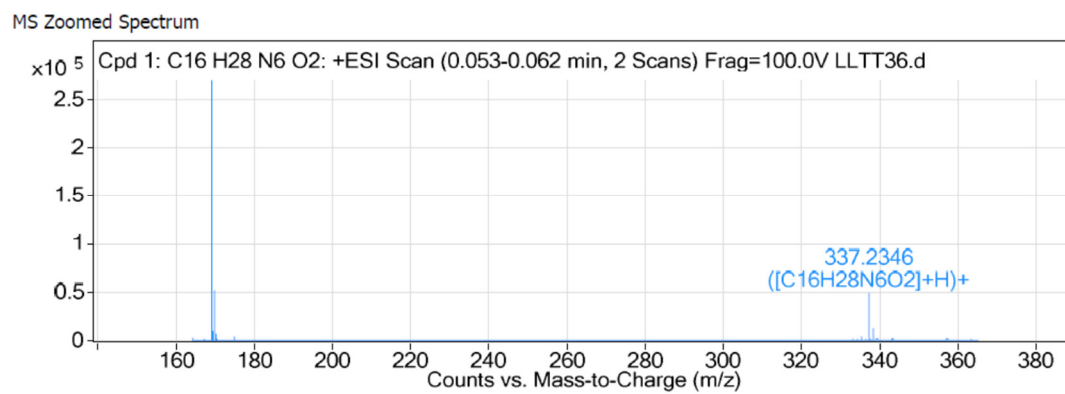

Figure S4. HRMS (Q-TOF/ESI) spectrum of L3.

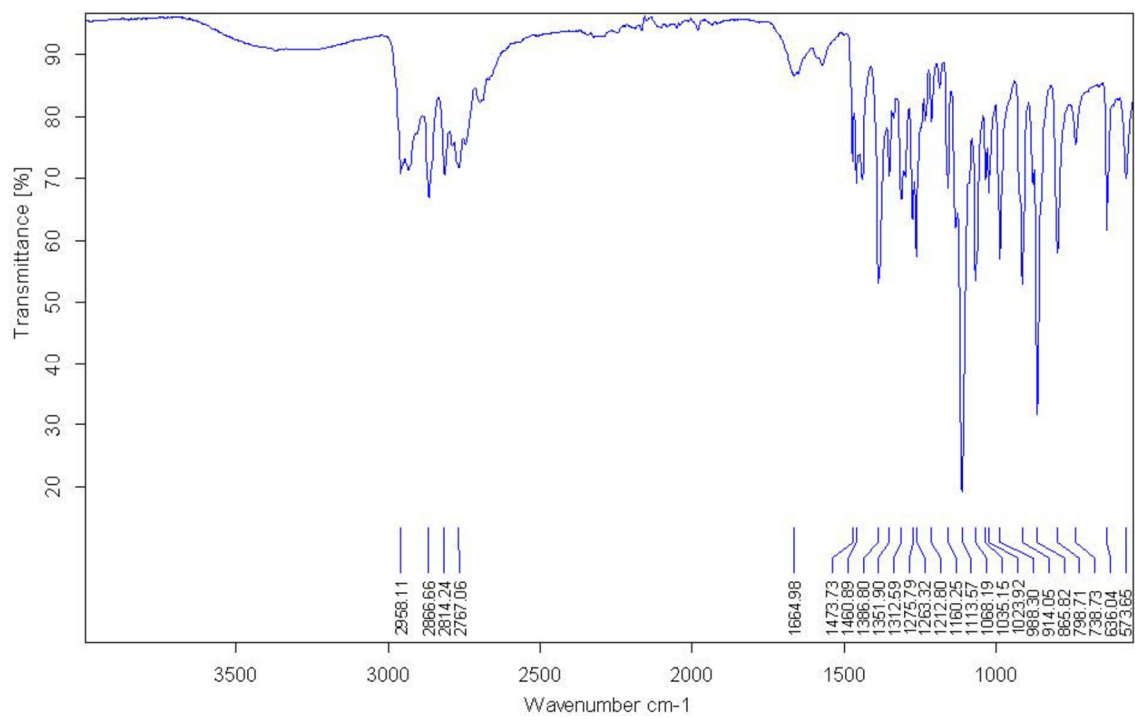

Figure S5. FTIR (ATR) of L4.



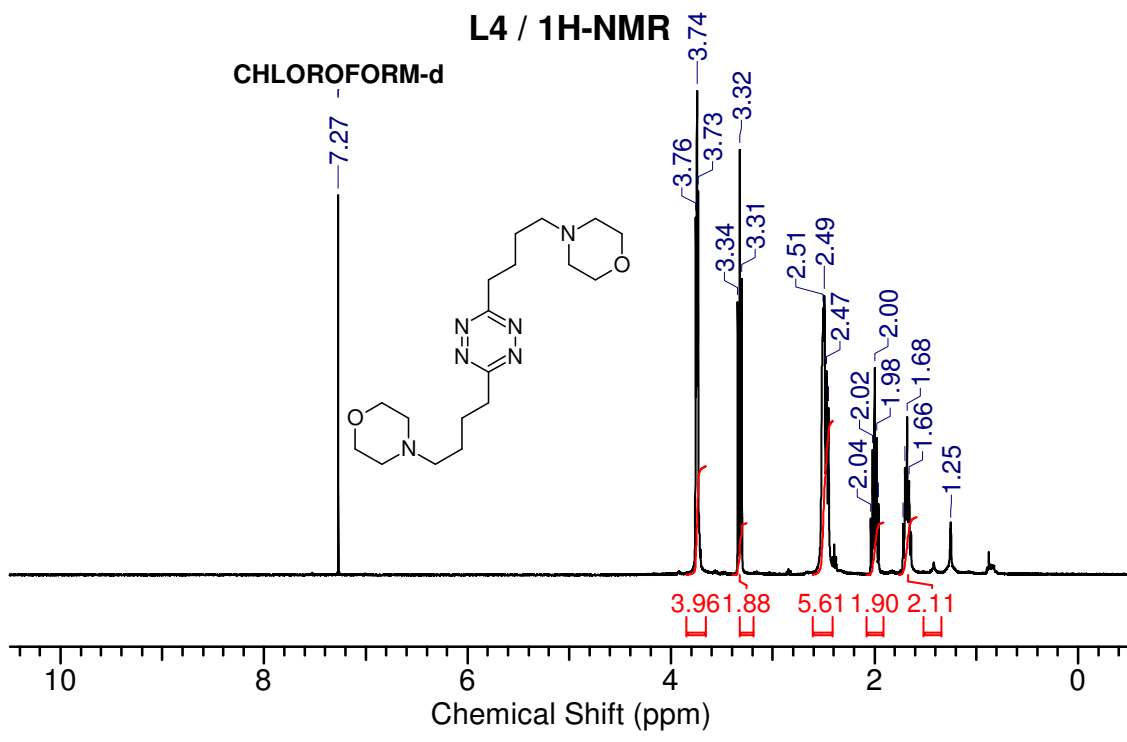

Figure S6. <sup>1</sup>H-NMR (CDCl<sub>3</sub>, 400 MHz) spectrum of L4.

# L4 / <sup>13</sup>C-NMR

CHLOROFORM-d

| No. | (ppm)  | (Hz)    | Height |
|-----|--------|---------|--------|
| 1   | 25.63  | 2578.3  | 0.1498 |
| 2   | 25.87  | 2603.2  | 0.3525 |
| 3   | 34.45  | 3465.9  | 0.3813 |
| 4   | 53.52  | 5385.0  | 0.6271 |
| 5   | 58.31  | 5866.2  | 0.3138 |
| 6   | 66.57  | 6698.1  | 0.3316 |
| 7   | 169.91 | 17094.7 | 0.2276 |

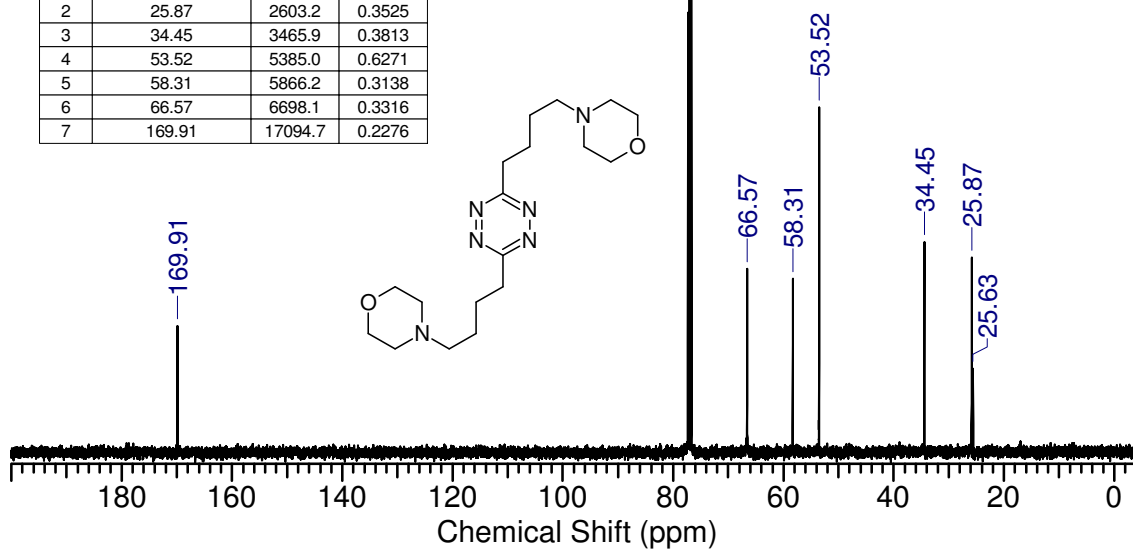

Figure S7. <sup>13</sup>C-NMR (CDCl<sub>3</sub>, 100 MHz) spectrum of L4.

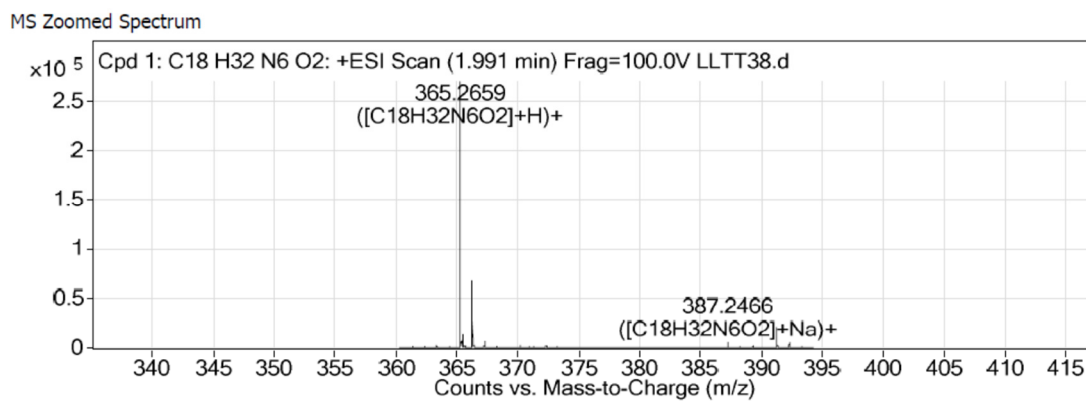

Figure S8. HRMS (Q-TOF/ESI) spectrum of L4.

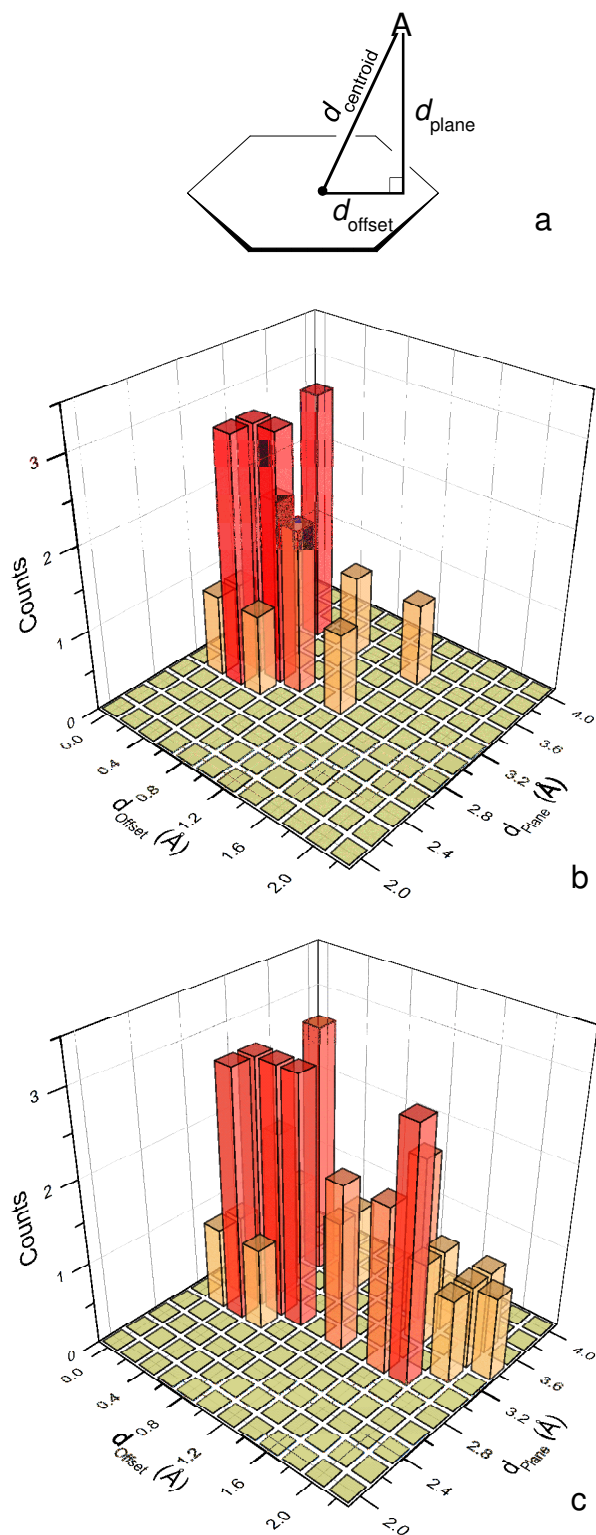

Figure S9. (a) Displacement of an atom A from the centre (centroid) of the tetrazine ring. (b) Frequency of shorter anion-ring contacts, for each anion, in the  $d_{\text{plane}}$  vs  $d_{\text{offset}}$  plane. (c) Frequency of all anion-ring contacts in the  $d_{\text{plane}}$  vs  $d_{\text{offset}}$  plane.

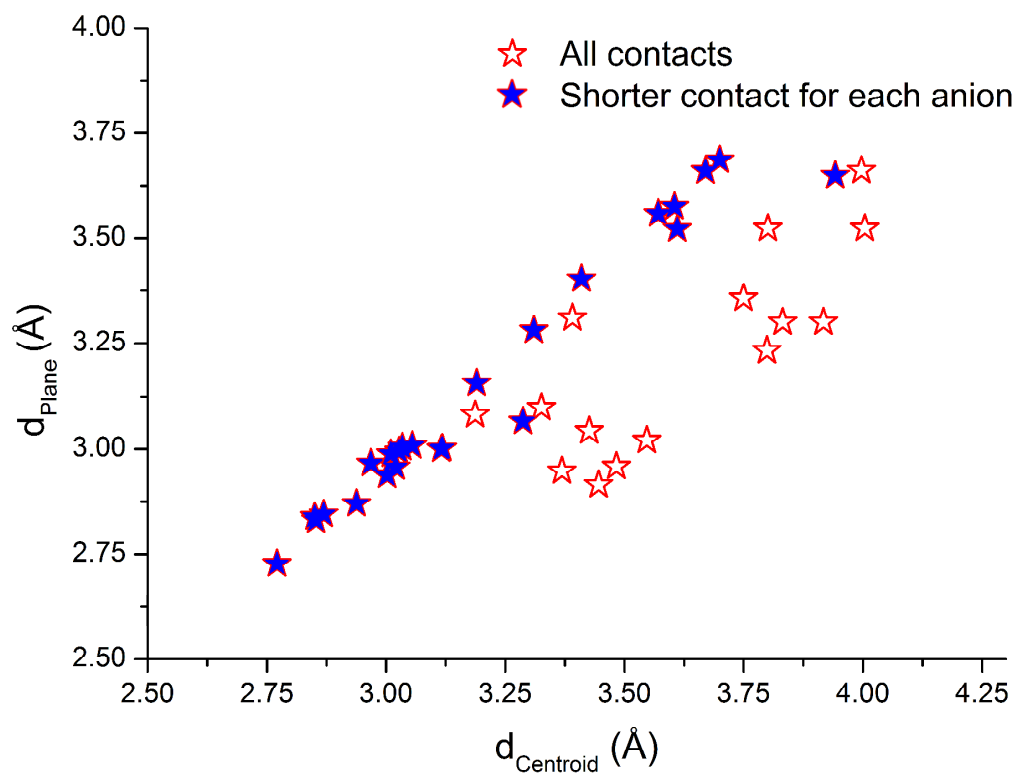

Figure S10. Correlation between  $d_{\text{plane}}$  and  $d_{\text{centroid}}$  distances in the crystal structures of L1-L4 anion complexes.

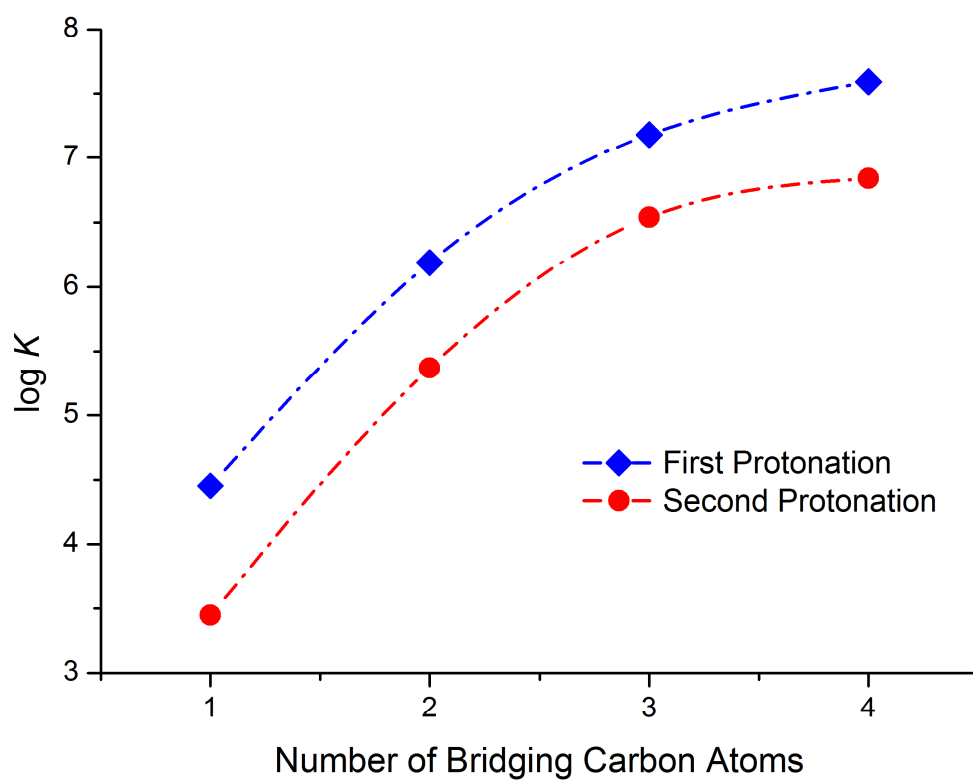

Figure S11. Hyperbolic fitting for the first and the second series of protonation constants ( $\log K$ ) of L1-L4 ligands.

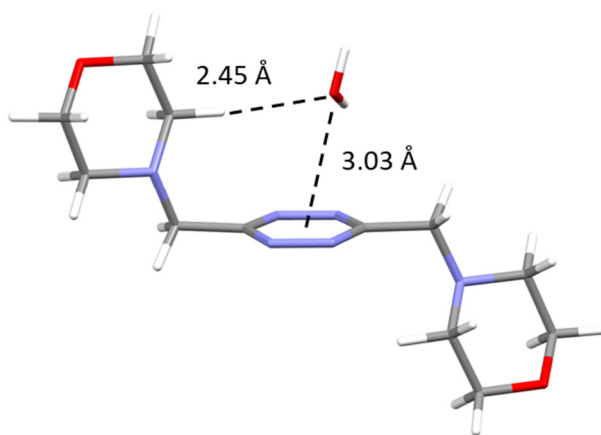

Figure S12. Calculated conformation for the [L1(H<sub>2</sub>O)] adduct.

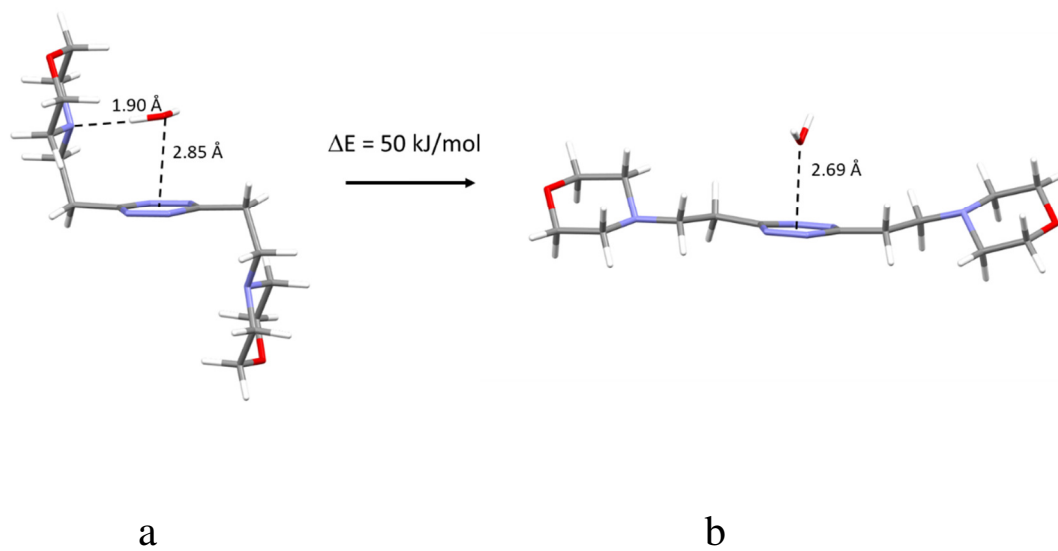

Figure S13. Calculated conformations for the [L2(H<sub>2</sub>O)] adduct: a) chair conformation, b) planar conformation.

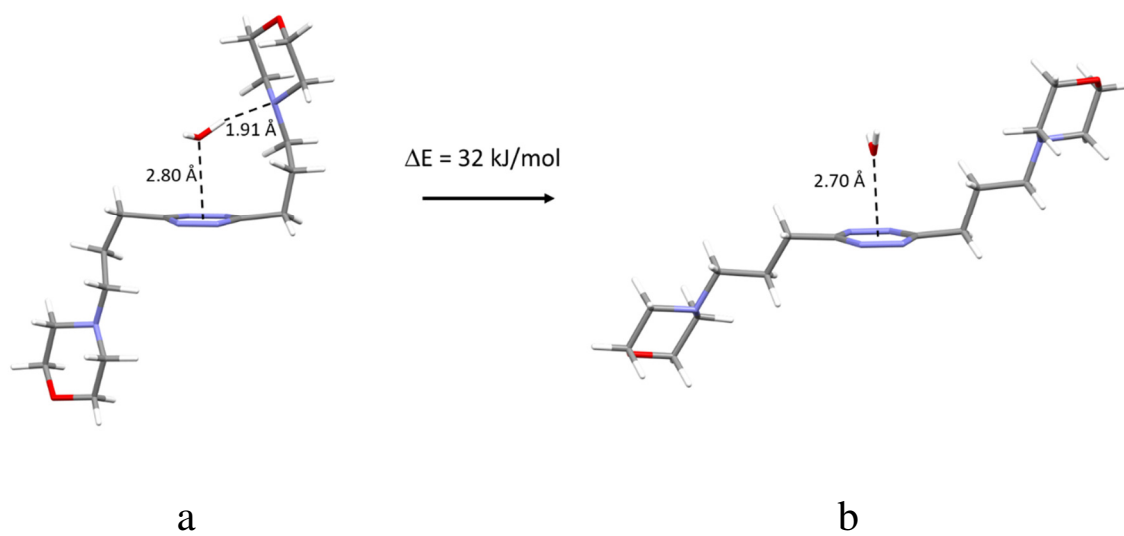

Figure S14. Calculated conformations for the [L3(H<sub>2</sub>O)] adduct: a) chair conformation, b) planar conformation.

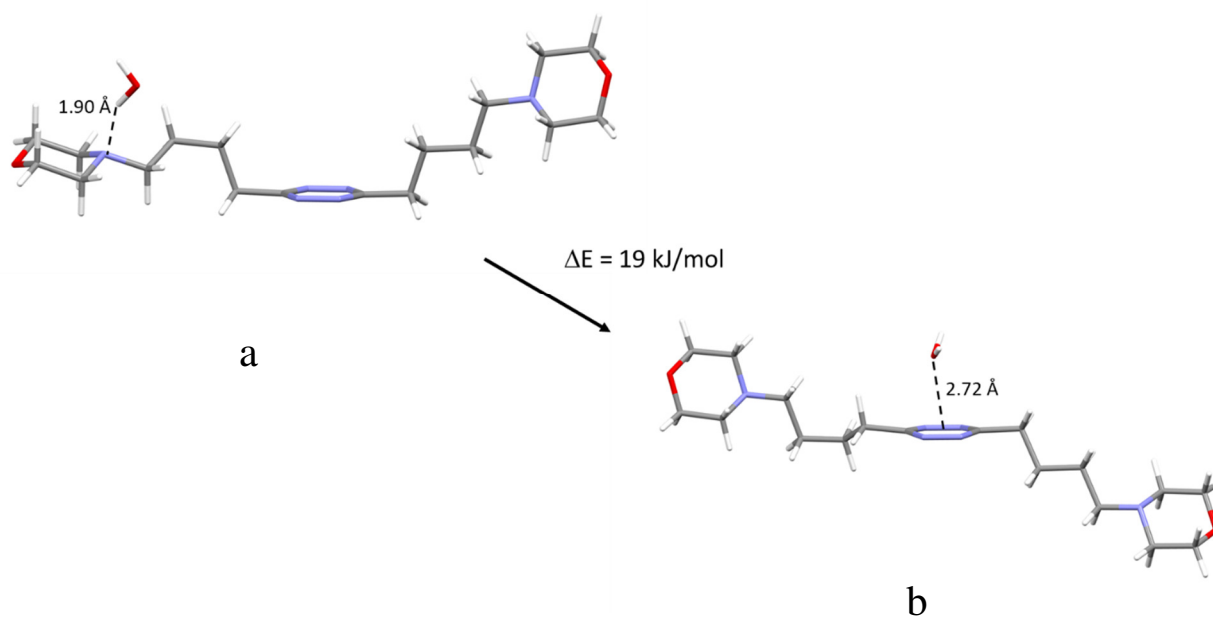

Figure S15. Calculated conformations for the [L4(H<sub>2</sub>O)] adduct: a) planar conformation, H-bond; b) planar conformation, lone pair- $\pi$ .



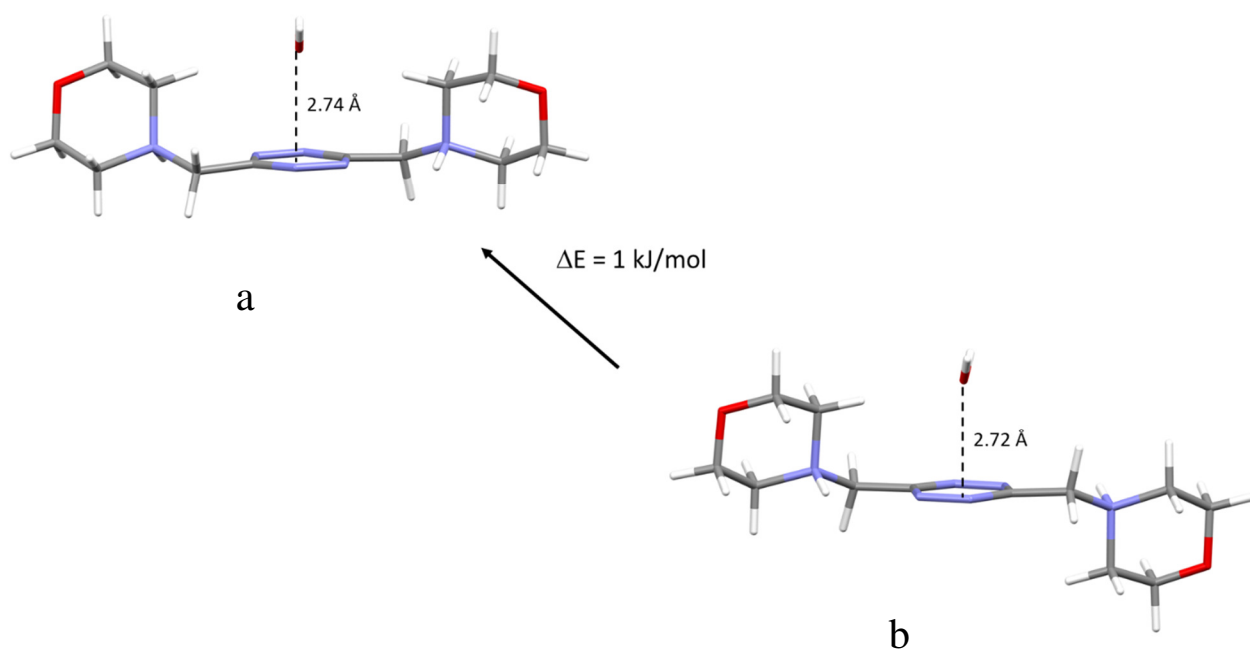

Figure S16. Calculated conformations for the  $[H_2L1(H_2O)]^{2+}$  adduct: a) boat conformation, b) chair conformation.

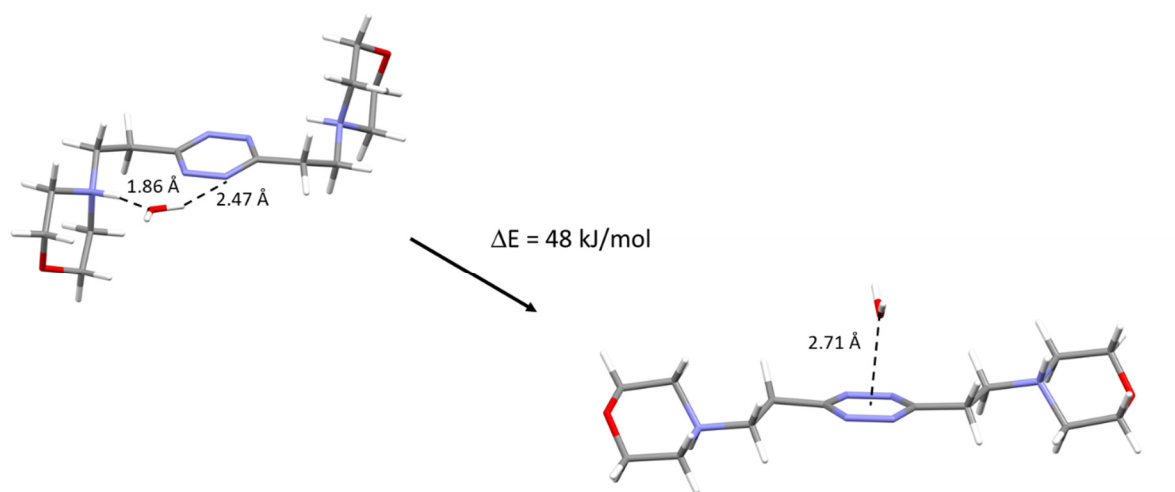

Figure S17. Calculated conformations for the  $[H_2L2(H_2O)]^{2+}$  adduct: a) chair conformation, b) planar conformation.

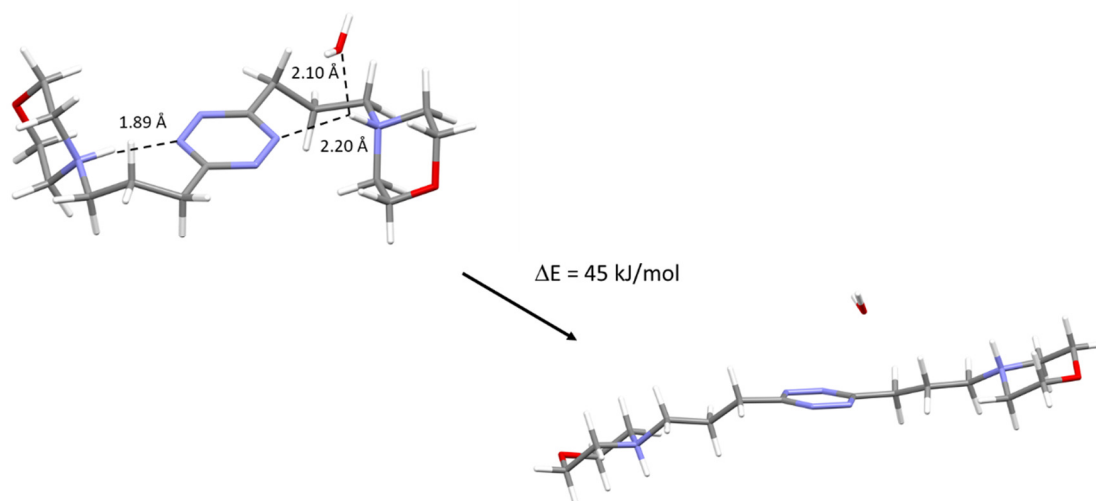

Figure S18. Calculated conformations for the  $[\text{H}_2\text{L3}(\text{H}_2\text{O})]^{2+}$  adduct.

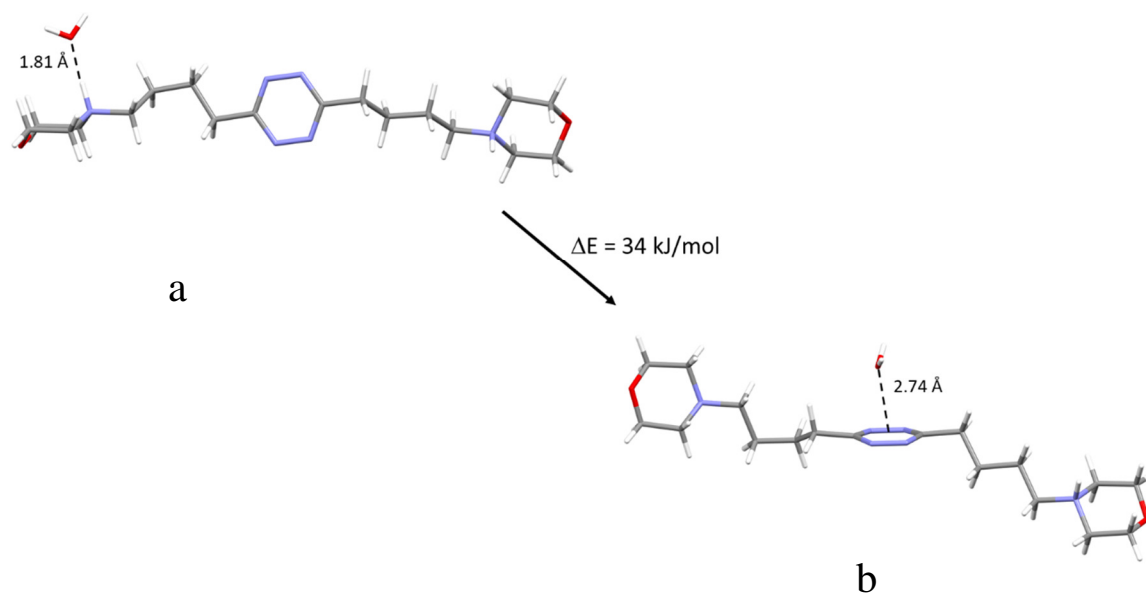

Figure S19. Calculated conformation for the  $[\text{H}_2\text{L4}(\text{H}_2\text{O})]^{2+}$  adduct: a) planar conformation, H-bond; b) planar conformation, lone pair- $\pi$ .

L3 ClO<sub>4</sub><sup>-</sup>

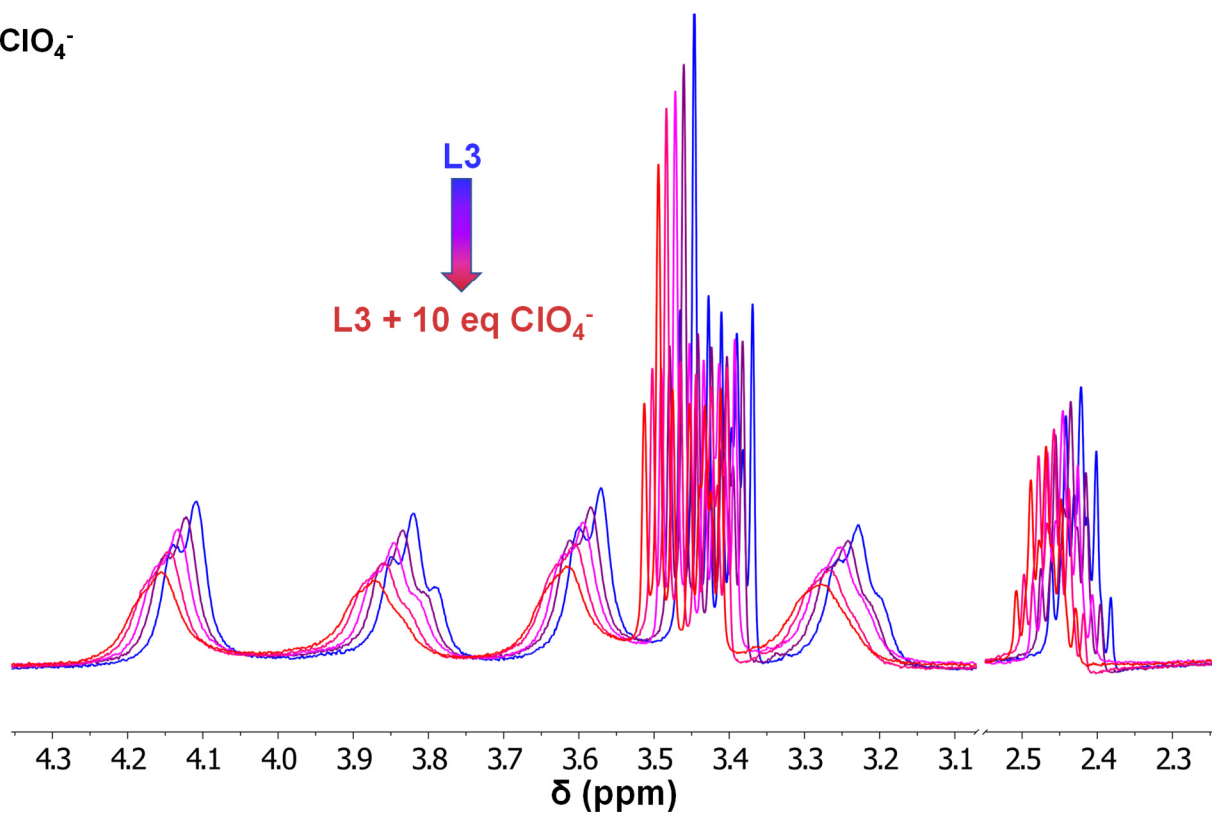

Figure S20. <sup>1</sup>H NMR spectra of L3 recorded in D<sub>2</sub>O (pH 4) in the absence and in the presence of increasing amounts of ClO<sub>4</sub><sup>-</sup>.

L3 PF<sub>6</sub><sup>-</sup>

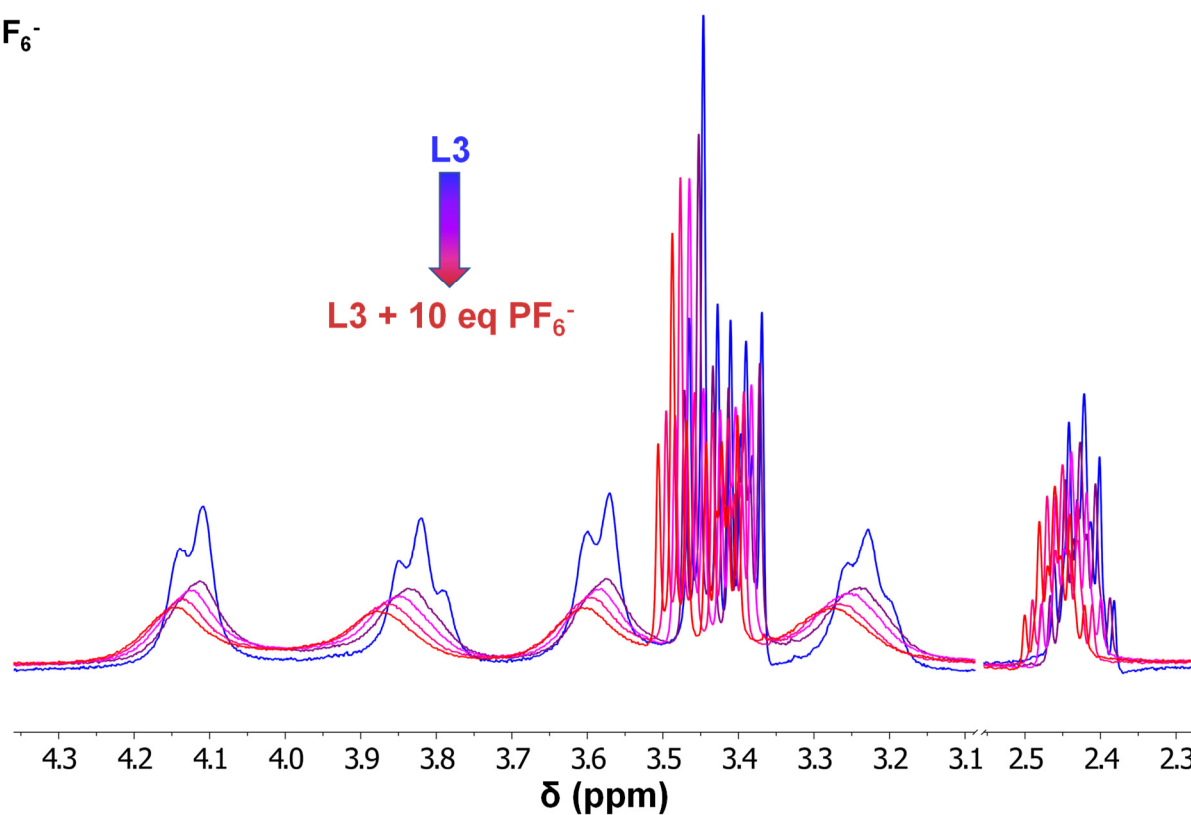

Figure S21. <sup>1</sup>H NMR spectra of L3 recorded in D<sub>2</sub>O (pH 4) in the absence and in the presence of increasing amounts of PF<sub>6</sub><sup>-</sup>.

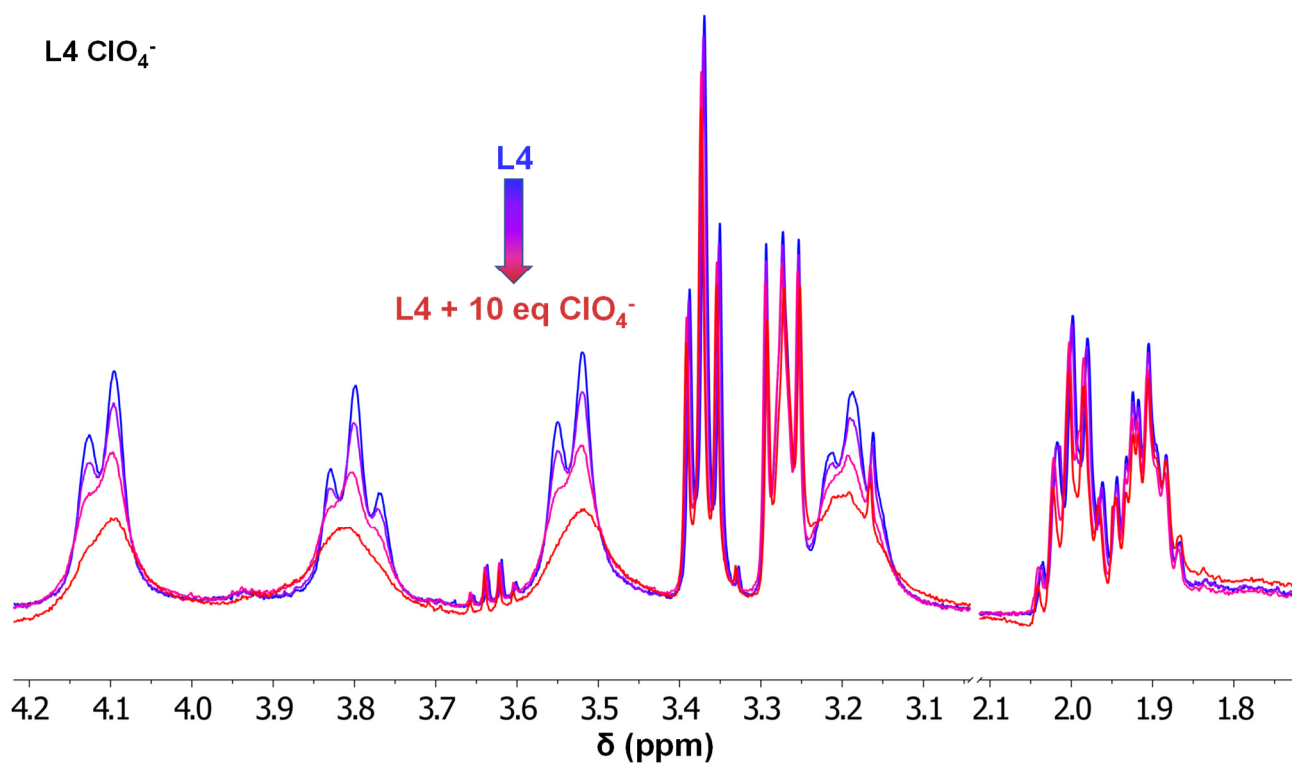

Figure S22. <sup>1</sup>H NMR spectra of L4 recorded in D<sub>2</sub>O (pH 4) in the absence and in the presence of increasing amounts of ClO<sub>4</sub><sup>-</sup>.

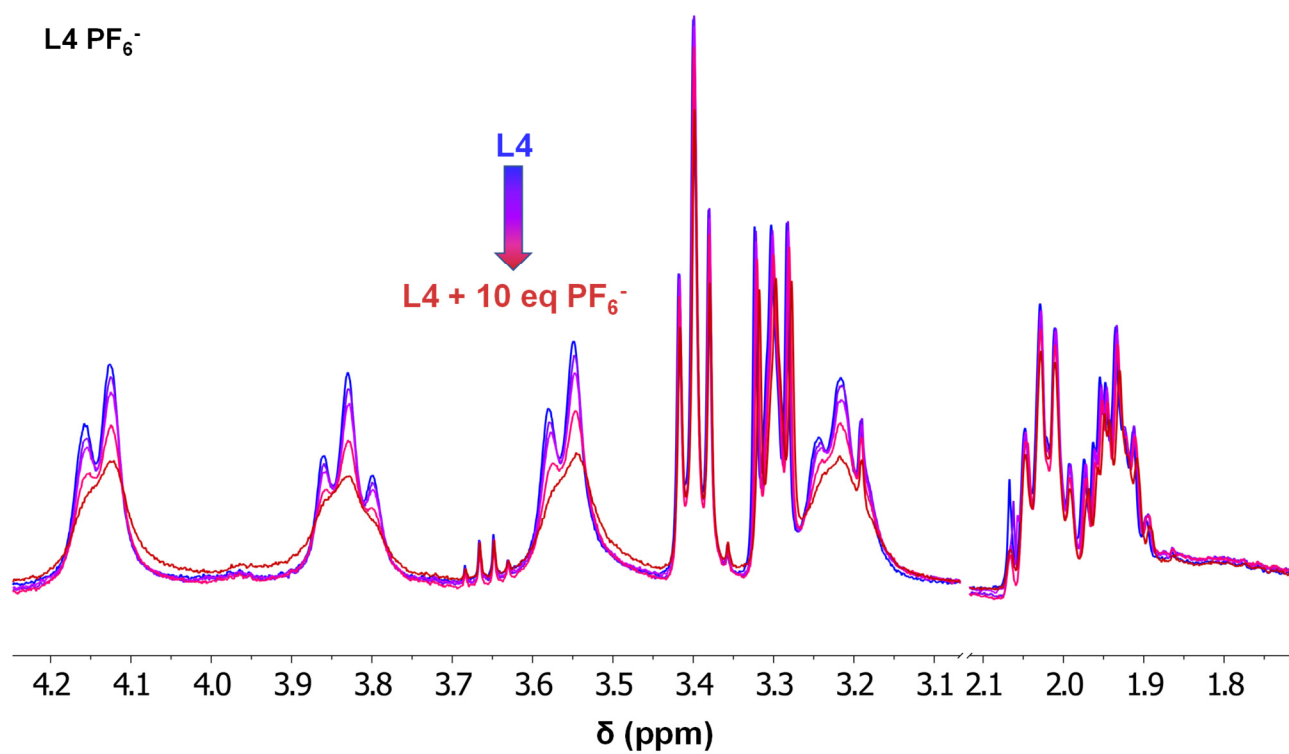

Figure S23. <sup>1</sup>H NMR spectra of L4 recorded in D<sub>2</sub>O (pH 4) in the absence and in the presence of increasing amounts of PF<sub>6</sub><sup>-</sup>.
